# Supplementary material
Source: Springer Nature journal article supplement (https://www.springermedizin.de/resource/supplementary/12936_2005_130_MOESM1_ESM.pdf/9546938)

Total 269 study patients recruited

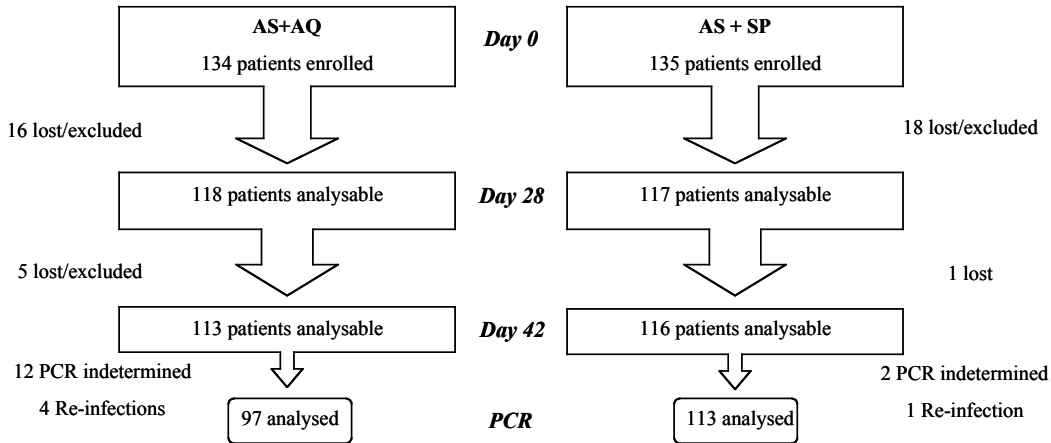

Supplement: MOESM1 [file 9546938]
